# Supplementary material
Source: PubMed Central journal article supplement (PMC3208283)
Supplement: supp_blood-2011-04-351528_TableS1.pdf [file supp_blood-2011-04-351528_TableS1.pdf]

| Tumor | Gene                              | Protein family       | Location  | Orientation | Mouse Chr. | Human Chr.    |
|-------|-----------------------------------|----------------------|-----------|-------------|------------|---------------|
| 125   | Mgst2                             | Enzyme               | 5', 12 kb | Inverse     | 3          | ND            |
| 125   | <i>Clec2d</i> <sup>B</sup>        | NK cell              | Intron 1  | Same        | 6          | 12p13         |
| 125   | <i>C3ar1</i> <sup>A</sup>         | Complement           | Intron 1  | Inverse     | 6          | 12p13.31      |
| 125   | AK053040 <sup>C</sup>             | ND                   | 3', 16 kb | Inverse     | 7          | ND            |
| 125   | <i>IL18</i> <sup>A</sup>          | Cytokine             | Intron 1  | Same        | 9          | 11q22.2       |
| 125   | <i>4931414P19Rik</i> <sup>B</sup> | ND                   | Intron 6  | Inverse     | 14         | ND            |
| 125   | <i>Pl4ka</i> <sup>B</sup>         | Cell cycle           | Intron 7  | Same        | 16         | 22q11.21      |
| 125   | <i>Zfp407</i>                     | Zincfinger protein   | Intron 1  | Inverse     | 18         | 18q23         |
|       |                                   |                      |           |             |            |               |
| 602   | AK053040 <sup>C</sup>             | ND                   | 3', 16 kb | Inverse     | 7          | ND            |
| 602   | <i>Btbd11</i>                     | Transcription factor | Intron 1  | Same        | 10         | 12q23.3       |
| 602   | <i>AK086952</i>                   | ND                   | Intron 3  | Inverse     | 11         | ND            |
| 602   | <i>Pik3ip1</i>                    | Membrane protein     | 5', 1 kb  | Inverse     | 11         | 22q12.2       |
| 602   | AK028654                          | ND                   |           | Same        | 12         | 14q22-q24     |
| 602   | <i>Atg10</i>                      | Enzyme               | Intron 5  | Inverse     | 13         | 5q14.2        |
| 602   | <i>Nsmce2</i> <sup>B</sup>        | DNA repair protein   | Intron 3  | Inverse     | 15         | 8q24.13       |
| 602   | <i>C3</i>                         | Complement protein   | 3', 4 kb  | Same        | 17         | 19p13.3-p13.2 |
| 602   | <i>Dym</i> <sup>A</sup>           | Membrane protein     | Intron 16 | Same        | 18         | 18q12-q21.1   |
|       |                                   |                      |           |             |            |               |
| 1744  | <i>Kcnq5</i>                      | Potassium binding    | 3', 50 kb | Inverse     | 1          | 6q14          |
| 1744  | <i>Dnajc6</i> <sup>A</sup>        | Heat shock protein   | Intron 1  | Inverse     | 4          | 1pter-q31.3   |
| 1744  | <i>D730049H07Rik</i>              | ND                   | Intron 1  | Inverse     | 5          | ND            |
| 1744  | <i>Ccr1</i> <sup>A</sup>          | Signal transduction  | 5', 25 kb | Inverse     | 9          | 3p21          |
| 1744  | <i>Ncf4</i> <sup>C</sup>          | Neutrophil function  | Intron 7  | Inverse     | 15         | 22q13.1       |
| 1744  | <i>Trat1</i>                      | Signal transduction  | 3', 10 kb | Inverse     | 16         | 3q13          |
|       |                                   |                      |           |             |            |               |
| 2103  | <i>Hoxa9</i> <sup>A,D</sup>       | Transcription factor | 3', 60 bp | Same        | 6          | 7p15-p14      |
| 2103  | <i>Lsm4</i> <sup>B</sup>          | RNA splicing         | 5',5kb    | Same        | 8          | 19p13.11      |
| 2103  | <i>Polm</i>                       | DNA binding          | Intron 10 | Inverse     | 11         | 7p13          |
|       |                                   |                      |           |             |            |               |
| 6280  | <i>Cacnb2</i>                     | Calcium channel      | Intron 2  | Same        | 2          | 10p12         |
| 6280  | <i>Asph</i> <sup>B</sup>          | Enzyme               | 3', 40 kb | Same        | 4          | 8q12.3        |
| 6280  | <i>Tbc1</i> <sup>B</sup>          | Cell cycle           | 3', 10 kb | Inverse     | 5          | 4p16.1        |

| Tumor | Gene                         | Protein family       | Location   | Orientation | Mouse Chr. | Human Chr. |
|-------|------------------------------|----------------------|------------|-------------|------------|------------|
| 6280  | <i>Tsga14</i> <sup>B</sup>   | Developmental        | 3', 1 kb   | Same        | 6          | 7q32       |
| 6280  | <i>Plscr2</i>                | Enzyme               | intron 4   | Same        | 9          | 3q23       |
| 6280  | <i>Bpil2</i>                 | ND                   | Intron 9   | Inverse     | 10         | ND         |
| 6280  | <i>Lcp1</i> <sup>A</sup>     | Cytoskeleton binding | Intron 1   | Same        | 14         | 14q11.2    |
|       |                              |                      |            |             |            |            |
| 6904  | <i>Csf1</i> <sup>A</sup>     | Macrophage           | Exon 4     | Same        | 3          | 1p21-p13   |
| 6904  | <i>Gab2</i>                  | Signal transduction  | Intron 1   | Same        | 7          | 11q14.1    |
| 6904  | <i>Slco3a1</i>               | Anion transporter    | Intron 7   | Same        | 7          | 15q26      |
| 6904  | <i>Usp10 B</i>               | Ubiquitin cycle      | 3', 15 kb  | Same        | 8          | 16q24.1    |
| 6904  | <i>Ppm1h B</i>               | Enzyme               | Intron 1   | Same        | 10         | ND         |
| 6904  | <i>Dapk3</i>                 | Apoptosis signaling  | Intron 5   | Same        | 10         | 19p13.3    |
| 6904  | <i>Ccdc134</i>               | ND                   | Intron 1   | Same        | 15         | ND         |
| 6904  | <i>Hhex</i> <sup>A,D</sup>   | Transcription factor | 3', 50 kb  | Inverse     | 19         | 10q23.33   |
|       |                              |                      |            |             |            |            |
| 7106  | <i>Ints3</i>                 | RNA binding          | Intron 23  | Same        | 3          | 1q21.3     |
| 7106  | <i>Sox5</i> <sup>A</sup>     | Transcription factor | Intron 13  | Same        | 6          | 12p12.1    |
| 7106  | <i>Ear10</i>                 | Ribonuclease         | 3', 30 kb  | Inverse     | 14         | ND         |
|       |                              |                      |            |             |            |            |
| 7611  | <i>Tank</i>                  | NFkB activator       | Intron 7   | Inverse     | 2          | 2q24-q31   |
| 7611  | <i>Cry2</i>                  | Transcription factor | Intron 9   | Inverse     | 2          | 11p11.2    |
| 7611  | <i>Lmo2</i> <sup>A,D</sup>   | Transcription factor | 22 kb up   | Inverse     | 2          | 11p3       |
| 7611  | <i>Fat4</i>                  | Membrane protein     | 5', 150 kb | Same        | 3          | 4q28.1     |
| 7611  | <i>Med12l</i>                | ND                   | Intron 15  | Same        | 3          | 3q24       |
| 7611  | <i>Gata2</i> <sup>B,D</sup>  | Transcription factor | 5', 65 kb  | Same        | 6          | 3q21.3     |
| 7611  | <i>Gsr</i>                   | Enzyme               | 5', 0.5 kb | Same        | 8          | 8p21.1     |
| 7611  | <i>Gpx1</i> <sup>A</sup>     | Enzyme               | 3', 2 kb   | Inverse     | 9          | 3p21.3     |
| 7611  | <i>Ncf4</i> <sup>C</sup>     | Neutrophil function  | 3', 16 kb  | Inverse     | 15         | 22q13.1    |
|       |                              |                      |            |             |            |            |
| 7612  | <i>Gng2</i> <sup>B</sup>     | Signal transduction  | 3', 7 kb   | Inverse     | 14         | 14q21      |
| 7612  | <i>Col4a6</i>                | Membrane protein     | Intron 45  | Inverse     | X          | Xq22       |
| 7612  | <i>Tbl1x</i> <sup>B</sup>    | Transcription factor | 5', 70 kb  | Same        | X          | Xp22.3     |
|       |                              |                      |            |             |            |            |
| 7613  | <i>Notch2</i> <sup>A,D</sup> | Signal transduction  | 5', 75 kb  | Inverse     | 3          | 1p13-p11   |

| Tumor | Gene                             | Protein family         | Location   | Orientation | Mouse Chr. | Human Chr.    |
|-------|----------------------------------|------------------------|------------|-------------|------------|---------------|
| 7613  | <i>Wscd2</i>                     | ND                     | 3', 8 kb   | Same        | 5          | 12q23.3       |
| 7613  | <i>LOC74349</i>                  | ND                     | Intron 11  | Inverse     | 7          | ND            |
| 7613  | <i>Lims1</i>                     | Adhesion protein       | Intron 1   | Same        | 10         | 2q12.3-q13    |
|       |                                  |                        |            |             |            |               |
| 8004  | <i>Crtc1</i>                     | Transcription factor   | Intron 13  | Same        | 8          | 19p13.11      |
| 8004  | <i>Lrgm</i>                      | Cytokine signaling     | Intron 9   | Same        | 11         | 5q33.1        |
| 8004  | <i>Pabpc1</i>                    | Poly A binding protein | 5', 20 kb  | Same        | 15         | 8q22.2-q23    |
| 8004  | <i>Mettl4<sup>D</sup></i>        | Enzyme                 | 5', 0.3 kb | Same        | 17         | 18p11.32      |
|       |                                  |                        |            |             |            |               |
| 9459  | <i>Phactr4</i>                   | Neural development     | 5', 2.5 kb | Same        | 4          | 1p35.3        |
| 9459  | <i>2010305C02Rik<sup>B</sup></i> | ND                     | 3', 8 kb   | Same        | 11         | ND            |
| 9459  | <i>Wdr81</i>                     | ND                     | 3', 8 kb   | Same        | 11         | 17p13.3       |
| 9459  | <i>AK032913</i>                  | ND                     | 20 kb up   | Inverse     | 12         | 14q22-q24     |
|       |                                  |                        |            |             |            |               |
| 9512  | <i>Wdr42a</i>                    | ND                     | Intron 2   | Same        | 1          | ND            |
| 9512  | <i>AK034478</i>                  | ND                     | 5', 20 kb  | Inverse     | 3          | ND            |
| 9512  | <i>Tmem49<sup>B</sup></i>        | Membrane protein       | Intron 2   | Same        | 11         | 17q23.1       |
| 9512  | <i>Tatdn1</i>                    | Nuclease               | Intron 7   | Inverse     | 15         | 8q24.13       |
|       |                                  |                        |            |             |            |               |
| 9965  | <i>Map4k4</i>                    | Protein kinase         | Intron 2   | Same        | 1          | 2q11.2-q12    |
| 9965  | <i>Cd82<sup>B</sup></i>          | Tumor suppressor       | 5', 3 kb   | Inverse     | 2          | 11p11.2       |
| 9965  | <i>Ube3b</i>                     | Enzyme                 | Intron 1   | Same        | 5          | 12q24.11      |
| 9965  | <i>Ctsc<sup>B</sup></i>          | Enzyme                 | Intron 1   | Same        | 7          | 11q14.1-q14.3 |
| 9965  | <i>AK164976</i>                  | ND                     | 35 kb up   | Same        | 10         | ND            |
| 9965  | <i>Ssh2<sup>B</sup></i>          | Binding protein        | Intron 4   | Same        | 11         | 17q11.2       |
| 9965  | <i>Hdac7</i>                     | Transcription factor   | 3', 2.5 kb | Inverse     | 15         | 12q13.1       |
